# Supplementary material for: Synthesis of nanoporous cobalt/carbon materials by a carbonized zeolitic imidazolate framework-9 and adsorption of dyes
Source: Royal Society of Chemistry journal article supplement (doi:10.1039/c7nj03745g), 2017-12-11
Supplement: c7nj03745g1.pdf [file c7nj03745g1.pdf]

## Electronic Supplementary Information

### Synthesis of nanoporous cobalt/carbon materials by carbonized zeolitic imidazolate framework-9 and adsorption of dyes

Ting-Ting Han<sup>a,b</sup>, He-Long Bai<sup>b</sup>, Ying-Ying Liu<sup>a,\*</sup> and Jian-Fang Ma<sup>a,\*</sup>

<sup>a</sup> *Key Laboratory of Polyoxometalate Science, Department of Chemistry, Northeast Normal University, Changchun 130024, P.R. China*

<sup>b</sup> *Department of Chemistry, Changchun Normal University, Changchun 130032, P.R. China*

## Experimental

### 1.1 Chemicals

Co(CH<sub>3</sub>COO)<sub>2</sub>·4H<sub>2</sub>O (98%), benzimidazole (Hbim, 98%), anhydrous methanol and N,N-dimethylformamide (DMF) were purchased from commercial suppliers. Rhodamine 6G (98%), rhodamine B (98%), methylene green (96%), malachite green (98%), crystal violet (98%), rosanilin (98%), methyl blue (AR), methyl orange (AR), acid red 18 (98%), acid orange 7 (98%), orange G (98%) and congo red (98%) were used without further purification.

### 1.2 Synthesis of ZIF-9

ZIF-9 was prepared according to the procedures reported previously.<sup>1</sup> 100 mL

anhydrous methanol solution of  $\text{Co}(\text{CH}_3\text{COO})_2 \cdot 4\text{H}_2\text{O}$  (10 mmol) was added rapidly to 100 mL DMF solution of Hbim (20 mmol). Then, the resultant mixture was stirred at room temperature ( $\sim 25^\circ\text{C}$ ) for 6 h to complete the crystallization. The obtained purple precipitate (ZIF-9) was collected by centrifugation and washed with anhydrous methanol for 4 times, and then dried at  $80^\circ\text{C}$  under vacuum. The powder X-ray diffraction (PXRD) pattern, FT-IR spectrum and scanning electron microscope (SEM) image of the synthesized ZIF-9 were given in Fig. S1. By comparing with the reported literature, the characterizations indicate that ZIF-9 was successfully synthesized.<sup>2</sup>

1 N. L. Torad, M. Hu, S. Ishihara, H. Sukegawa, A. A. Belik, M. Imura, K. Ariga, Y. Sakka and T. Yamauchi, *Small*, 2014, **10**, 2096.

2 S. S. Yan, S. X. Ouyang, H. Xu, M. Zhao, X. L. Zhang and J. H. Ye, *J. Mater. Chem. A*, 2016, **4**, 15126.

### 1.3 Characterization

The PXRD measurements were collected on a Rigaku Dmax 2000 X-ray diffractometer with graphite monochromatized  $\text{Cu } K_\alpha$  radiation ( $\lambda = 0.154 \text{ nm}$ ) and  $2\theta$  ranging from  $7$  to  $80^\circ$ . The FT-IR spectroscopy was conducted using a Mattson Alpha Centauri spectrometer on KBr pellets from  $4000$ - $400 \text{ cm}^{-1}$ . SEM images were obtained on Hitachi SU8010, and the samples were mounted on aluminum studs by using adhesive graphite tape and sputter coated with gold before analysis. Raman spectra were performed with a Jobin Yvon HR800 micro-Raman spectrometer using a  $488 \text{ nm}$  line from a He-Cd laser. The  $\text{N}_2$  adsorption-desorption experiments at  $77 \text{ K}$  were conducted

on automatic volumetric adsorption equipment (V-Sorb 2800S). Pore size distributions were calculated using density functional theory method.

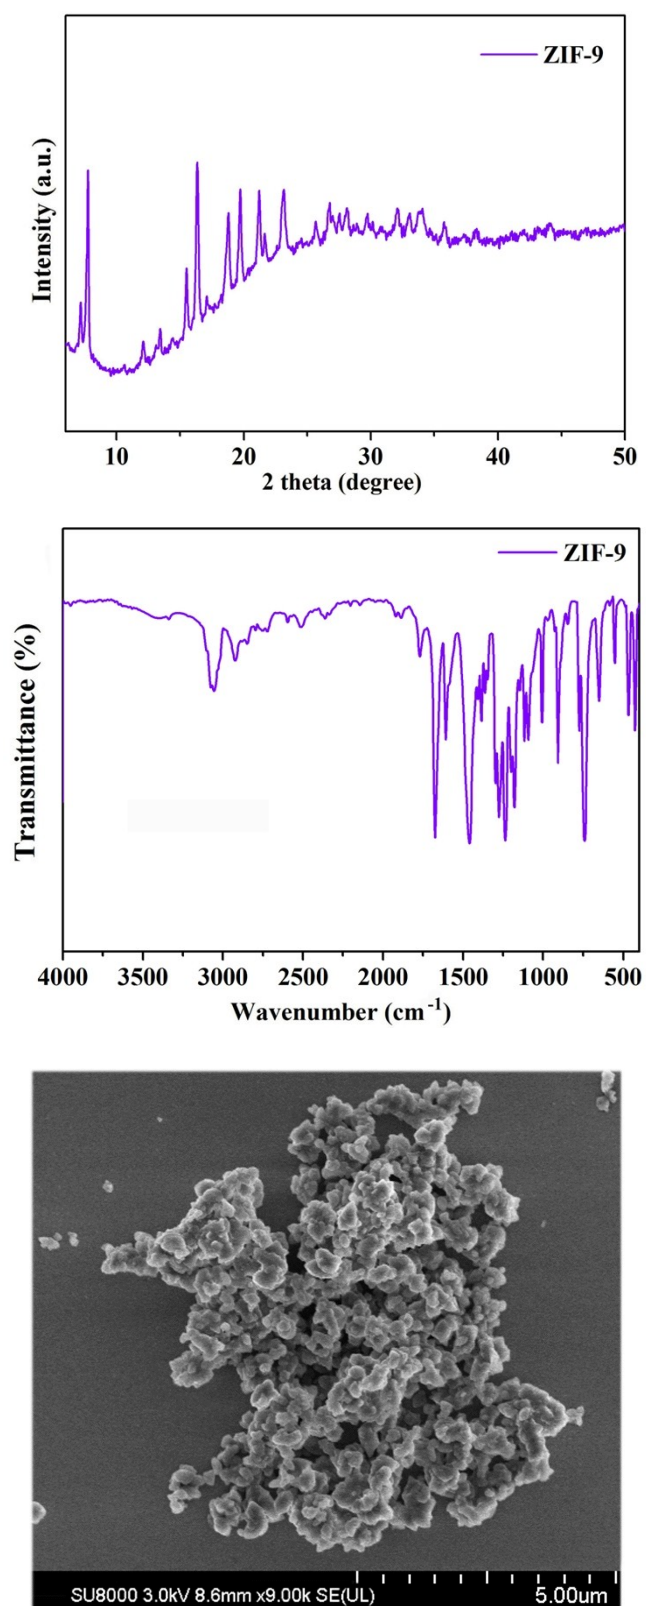

**Fig. S1** PXRD pattern, FT-IR spectrum and SEM image of as-synthesized ZIF-9.

**Table S1** The molecular structures, molecular weights ( $M_w$ ) and calibrated UV-vis absorption wavelengths ( $\lambda$ ) of dye molecules.

|                      |                       |                       |
|----------------------|-----------------------|-----------------------|
| Dyes                 | Rhodamine 6G (R6G)    | Rhodamine B (RHB)     |
| $M_w$                | 479.0                 | 479.0                 |
| $\lambda$ (nm)       | 565                   | 554                   |
| Molecular structures |                       |                       |
| Dyes                 | Methylene green (MeG) | Malachite green (MaG) |
| $M_w$                | 433.0                 | 463.5                 |
| $\lambda$ (nm)       | 656                   | 617                   |
| Molecular structures |                       |                       |
| Dyes                 | Crystal violet (CV)   | Rosanilin (RO)        |
| $M_w$                | 372.5                 | 337.8                 |
| $\lambda$ (nm)       | 583                   | 543                   |
| Molecular structures |                       |                       |
| Dyes                 | Methyl blue (MB)      | Methyl orange (MO)    |
| $M_w$                | 799.0                 | 327.4                 |
| $\lambda$ (nm)       | 627                   | 464                   |

|                      |                                                                                     |                                                                                      |
|----------------------|-------------------------------------------------------------------------------------|--------------------------------------------------------------------------------------|
| Molecular structures | 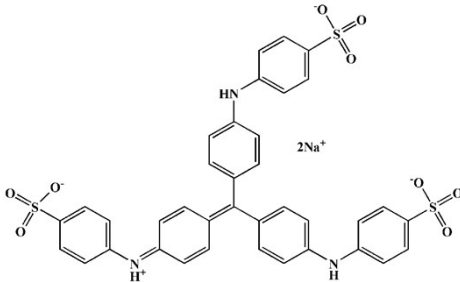   |    |
| Dyes                 | Acid red 18 (AR)                                                                    | Acid orange 7 (AO)                                                                   |
| M <sub>w</sub>       | 604.5                                                                               | 350.3                                                                                |
| λ (nm)               | 507                                                                                 | 484                                                                                  |
| Molecular structures |    |    |
| Dyes                 | Orange G (OG)                                                                       | Congo red (CR)                                                                       |
| M <sub>w</sub>       | 452.4                                                                               | 696.7                                                                                |
| λ (nm)               | 478                                                                                 | 495                                                                                  |
| Molecular structures |  |  |

**Table S2** Porosity properties of the as-prepared Z9-600, Z9-700, Z9-800 and Z9-900.

| Samples | BET surface area (m <sup>2</sup> /g) | Total pore volume (cm <sup>3</sup> /g) | Langmuir Surface area (m <sup>2</sup> /g) | Pore size distribution (nm) |
|---------|--------------------------------------|----------------------------------------|-------------------------------------------|-----------------------------|
| Z9-600  | 354.9                                | 0.48                                   | 477.1                                     | 0.75-2.30                   |
| Z9-700  | 270.6                                | 0.43                                   | 376.8                                     | 0.75-2.25                   |
| Z9-800  | 218.1                                | 0.36                                   | 297.8                                     | 0.63-2.20                   |
| Z9-900  | 143.7                                | 0.31                                   | 194.1                                     | 0.70-2.20                   |

**Table S3** Parameters of pseudo-second-order kinetic model and intraparticle diffusion

kinetic model of dyes adsorbed on Z9-600.

| Dyes                            | Second-order kinetics |                 |       | Intraparticle diffusion kinetics     |       |         |                                      |       |         |
|---------------------------------|-----------------------|-----------------|-------|--------------------------------------|-------|---------|--------------------------------------|-------|---------|
|                                 | $q_e$<br>(mg/g)       | $K$<br>(g/mg·h) | $R^2$ | $K_{t1}$<br>(g/mg·h <sup>0.5</sup> ) | $C_1$ | $R_1^2$ | $K_{t2}$<br>(g/mg·h <sup>0.5</sup> ) | $C_2$ | $R_2^2$ |
| MeG( $C_0=0.5 \times 10^{-4}$ ) | 14.3                  | 0.127           | 0.999 | 1.73                                 | 8.33  | 0.86    | 0.01                                 | 14.03 | 0.22    |
| MeG( $C_0=0.8 \times 10^{-4}$ ) | 23.1                  | 0.066           | 0.999 | 3.19                                 | 12.04 | 0.87    | 0.02                                 | 22.63 | 0.22    |
| MeG( $C_0=1.0 \times 10^{-4}$ ) | 29.5                  | 0.023           | 0.999 | 6.89                                 | 5.39  | 0.93    | 0.03                                 | 28.32 | 0.22    |
| MeG( $C_0=2.0 \times 10^{-4}$ ) | 58.2                  | 0.024           | 0.999 | 3.86                                 | 41.54 | 0.98    | 0.29                                 | 55.29 | 0.51    |
| MeG( $C_0=2.5 \times 10^{-4}$ ) | 72.9                  | 0.012           | 0.999 | 7.63                                 | 40.78 | 0.97    | 0.87                                 | 65.03 | 0.96    |
| MaG( $C_0=2.0 \times 10^{-4}$ ) | 61.6                  | 0.136           | 0.994 | 13.78                                | 33.93 | 0.95    | 0.02                                 | 62.29 | 0.76    |
| CR( $C_0=1.0 \times 10^{-4}$ )  | 50.2                  | 0.006           | 0.997 | 12.98                                | 0.81  | 0.97    | 0.43                                 | 43.87 | 0.66    |
| RO( $C_0=2.0 \times 10^{-4}$ )  | 46.4                  | 0.041           | 0.996 | 14.11                                | 18.73 | 0.93    | 0.57                                 | 41.75 | 0.92    |
| AR( $C_0=1.0 \times 10^{-4}$ )  | 56.8                  | 0.001           | 0.996 | 8.56                                 | -6.71 | 0.98    | 3.13                                 | 18.84 | 0.86    |
| OG( $C_0=1.0 \times 10^{-4}$ )  | 34.0                  | 0.004           | 0.994 | 6.99                                 | -2.88 | 0.99    | 0.76                                 | 23.91 | 0.78    |
| CV( $C_0=1.0 \times 10^{-4}$ )  | 28.2                  | 0.013           | 0.998 | 6.27                                 | 2.82  | 0.95    | 0.61                                 | 22.30 | 0.72    |
| AO( $C_0=1.0 \times 10^{-4}$ )  | 23.9                  | 0.029           | 0.998 | 4.71                                 | 6.62  | 0.87    | 0.11                                 | 22.34 | 0.75    |
| MO( $C_0=1.0 \times 10^{-4}$ )  | 23.5                  | 0.010           | 0.997 | 6.36                                 | -2.71 | 0.99    | 0.01                                 | 21.21 | 0.70    |
| MB( $C_0=1.0 \times 10^{-4}$ )  | 62.6                  | 0.001           | 0.996 | 8.18                                 | -4.72 | 0.98    | 2.06                                 | 32.47 | 0.94    |
| RHB( $C_0=1.0 \times 10^{-4}$ ) | 30.3                  | 0.006           | 0.997 | 2.31                                 | 13.70 | 0.99    | 0.93                                 | 19.32 | 0.98    |
| R6G( $C_0=1.0 \times 10^{-4}$ ) | 27.6                  | 0.009           | 0.995 | 0.88                                 | 19.01 | 0.99    | 0.35                                 | 22.90 | 0.97    |

**Table S4** Fitting parameters of two kinds of isothermal models of MeG adsorbed on Z9-600.

|            |              |              |         |
|------------|--------------|--------------|---------|
| Langmuir   | $q_m$ (mg/g) | $K_L$ (L/mg) | $R_f^2$ |
|            | 71.4         | 7.8          | 0.924   |
| Freundlich | $K_F$ (mg/g) | $n$          | $R_f^2$ |
|            | 62.6         | 3.0          | 0.851   |

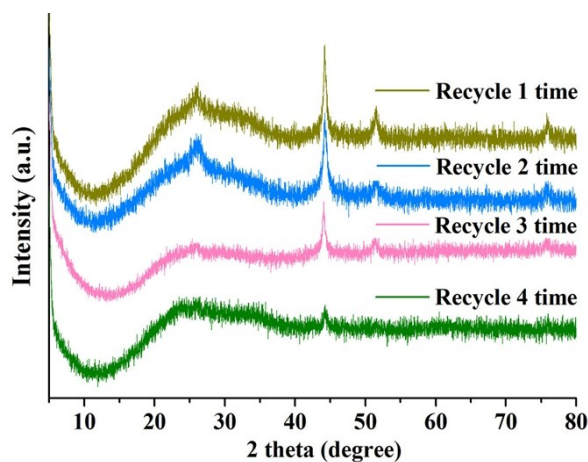

**Fig. S2** PXRD patterns of regenerated Z9-600 after 4 cycles.
